# Supplementary figures and images for: COVID-19 Vaccine Effectiveness at a Referral Hospital in Northern Peru: A Retrospective Cohort Study
Source: MDPI journal article supplement (doi:10.3390/vaccines10050812), 2022-05-20

Survival at three months in hospitalized patients for COVID-19

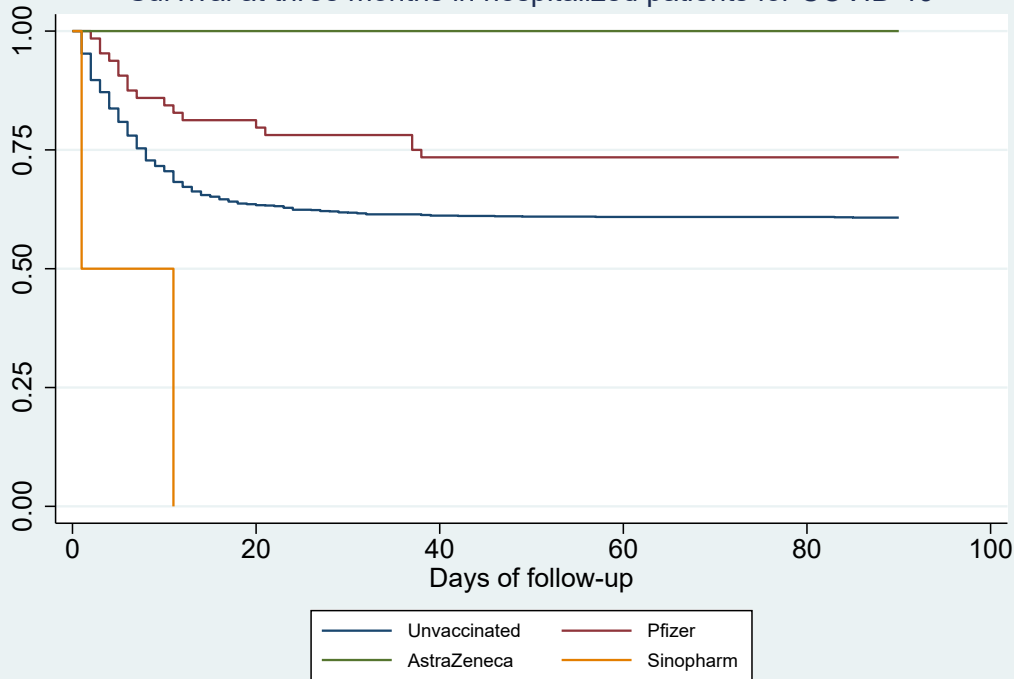

Supplement: s1 [file s1]

28-day survival in hospitalized patients for COVID-19

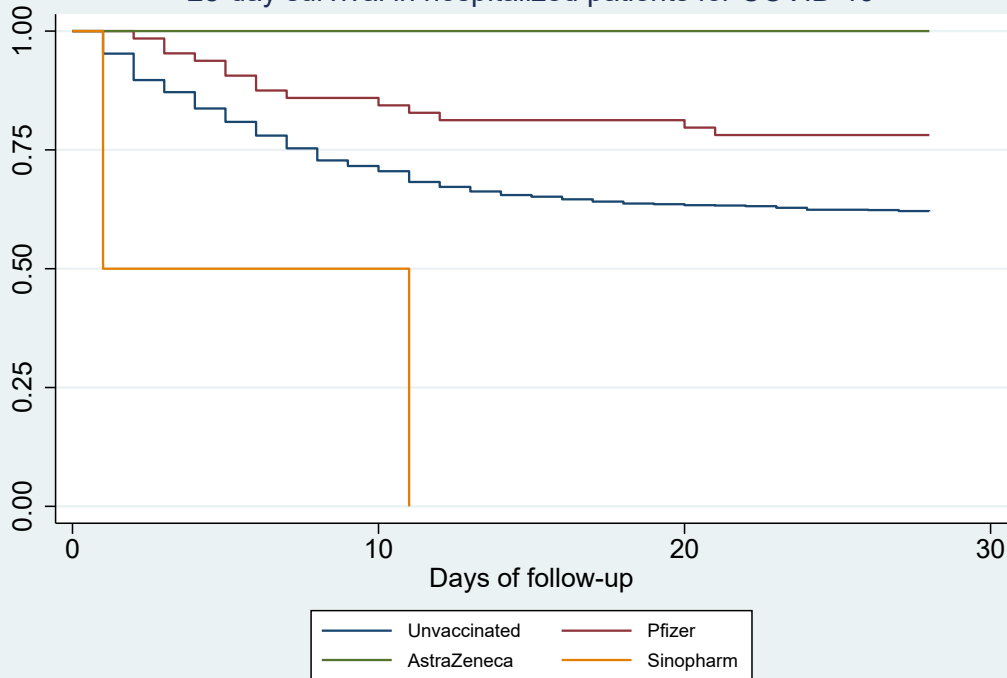

Supplement: s1 [file s1]
